# Supplementary material for: Modulating the structure and photochromic performance of hybrid metal chlorides with nonphotochromic 1,10-phenanthroline and its derivative
Source: Royal Society of Chemistry journal article supplement (doi:10.1039/d1dt02899e), 2021-01-01
Supplement: d1dt02899e1.pdf [file d1dt02899e1.pdf]

## **Supporting Information**

### **Modulating the structure and photochromic performance of hybrid metal chloride with nonphotochromic 1,10-phenanthroline and its derivative**

Fei Xu, Gang-Mei Li, A-Ni Wang, Song-De Han,\* Jie Pan and Guo-Ming Wang

College of Chemistry and Chemical Engineering, Qingdao University, Shandong 266071, P. R. China

## Instrumentation

Elemental analyses (EA, C, H, and N) were measured on a Perkin-Elmer 240C analyzer (Perkin-Elmer, USA). Thermogravimetric analysis (TGA) was measured on a Rigaku Thermo plus EVO2 TG-DTA 8121 analyzer under an air atmosphere. IR spectra were measured on a MAGNA-560 (Nicolet) FT-IR spectrometer with KBr pellets. The luminescence data were measured on an F-7000 FL spectrophotometer. The solid-state UV-Vis spectra were measured on a PerkinElmer Lambda-950 spectrophotometer. Electron paramagnetic resonance (EPR) spectroscopy was measured on a JEOL JES-FA200 EPR spectrometer. The experimental powder X-ray diffraction (PXRD) analyses were conducted on a Rigaku D/max-2550 diffractometer with Cu-K $\alpha$  radiation ( $\lambda = 1.5418 \text{ \AA}$ ). Simulation of the PXRD curve was carried out by the single-crystal data and diffraction-crystal module of the Mercury software. The Xe-lamp for photochromic characterization is a Perfect Light PLS-SXE 300. To assure the adequate photoactivation for ET, the irradiation time was enlarged to 100 min before magnetic characterizations. The magnetic data were gauged on a Quantum Design SQUID (MPMS-XL-7) magnetometer. The resulting data have been corrected with Pascal's constants.

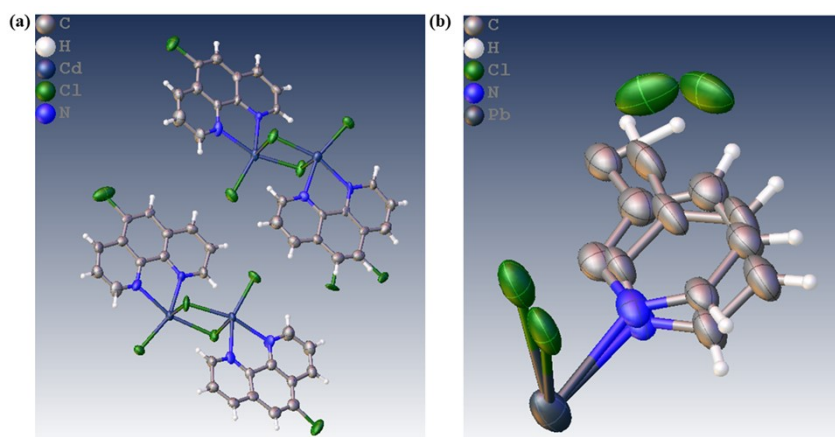

**Fig. S1** The disordered 5-Cl-phen ligand for complexes **5** (a) and **6** (b).

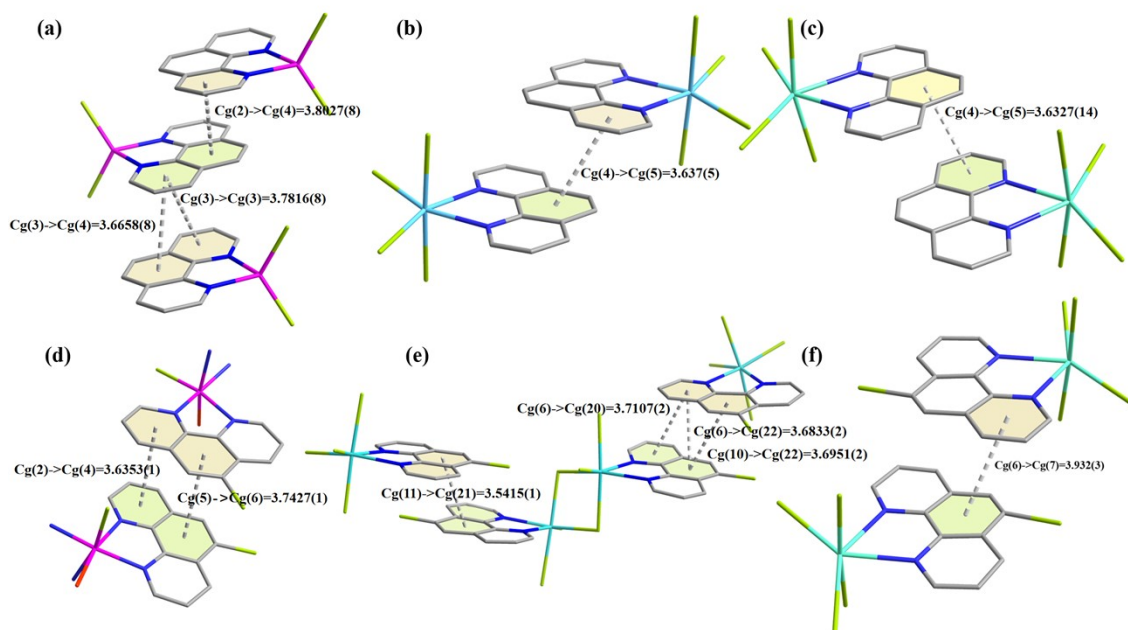

**Fig. S2** The  $\pi \cdots \pi$  stacking interactions for complexes **1-6**.

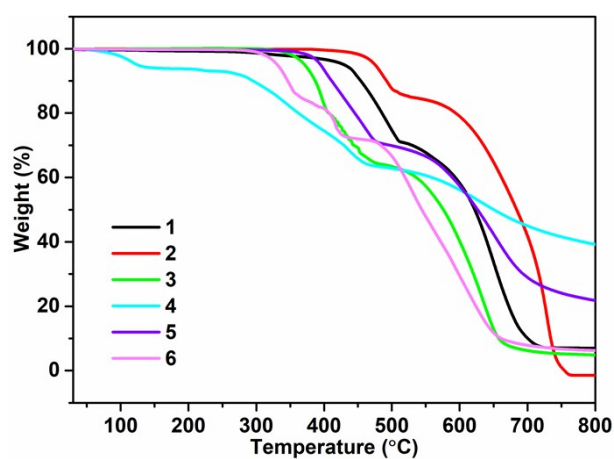

Fig. S3 TGA pattern of 1-6.

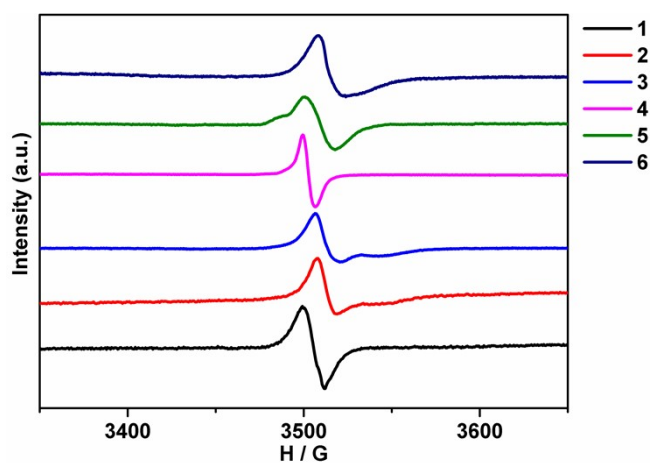

Fig. S4 The EPR plots of 1-6.

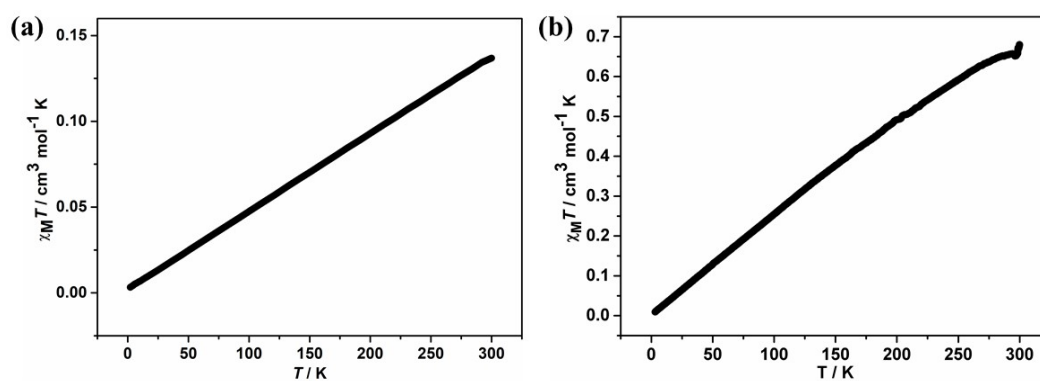

Fig. S5 The  $\chi_M T$  vs.  $T$  plots of the photoactivated samples of 1 (a) and 4 (b).

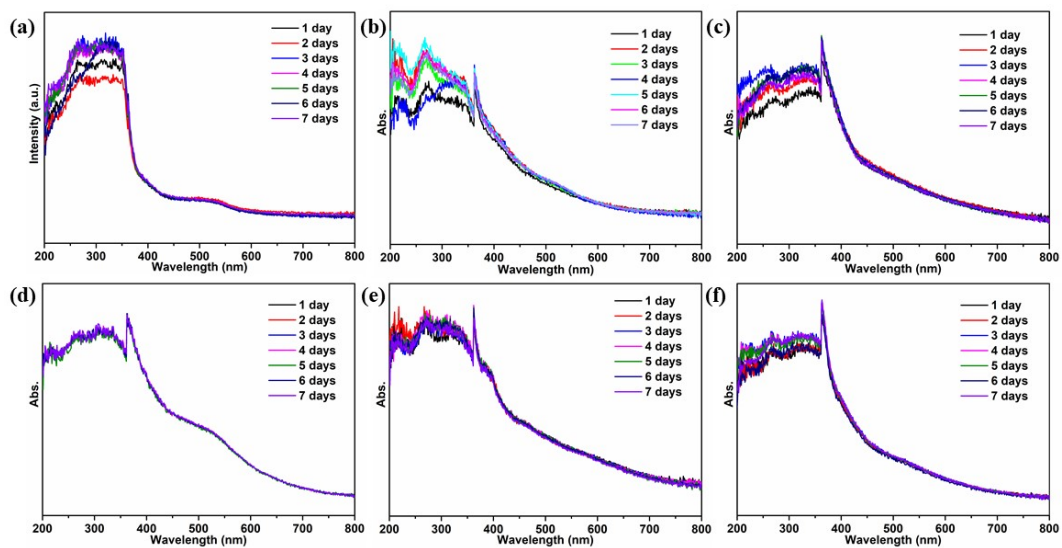

**Fig. S6** The time-dependent UV-Vis spectra of **1** (a), **2** (b), **3** (c), **4** (d), **5** (e) and **6** (f).

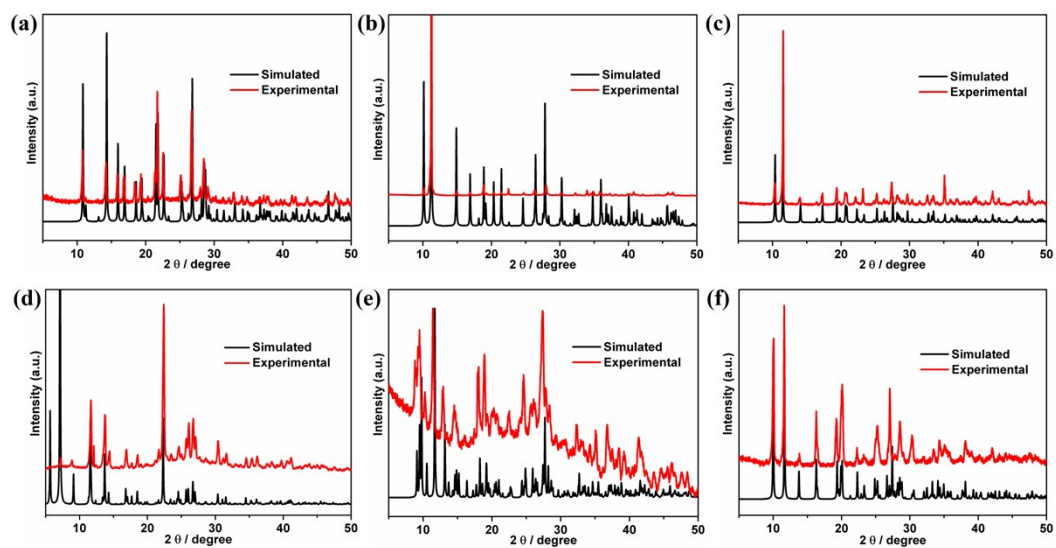

**Fig. S7** PXRD patterns of **1** (a), **2** (b), **3** (c), **4** (d), **5** (e) and **6** (f).

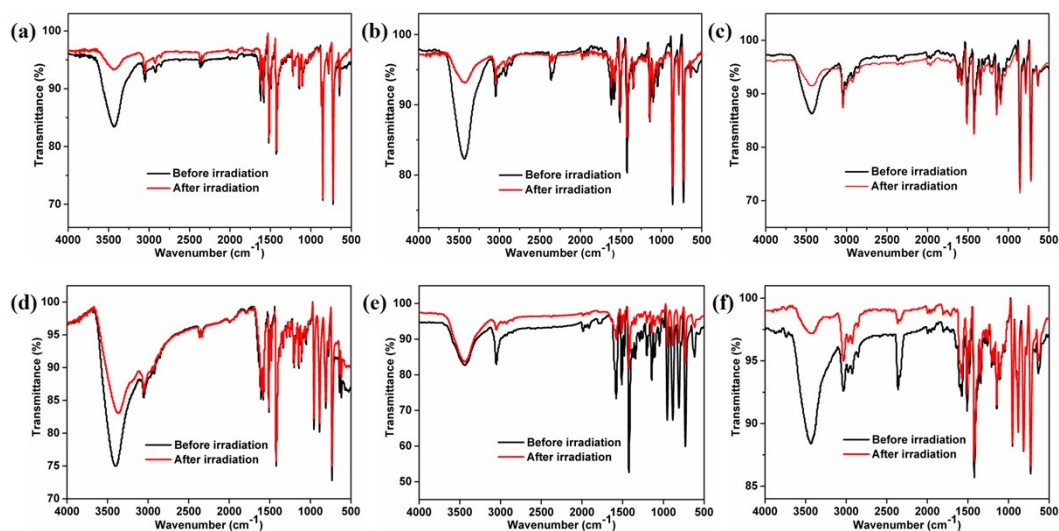

Fig. S8 IR patterns of **1** (a), **2** (b), **3** (c), **4** (d), **5** (e) and **6** (f).

Table S1. SHAPE analysis of the metal ions in **1-6**.

| Metal        | Label  | Shape                         | Symmetry | Distortion |
|--------------|--------|-------------------------------|----------|------------|
| <b>1-Zn1</b> | SP-4   | Square                        | $D_{4h}$ | 24.621     |
| <b>1-Zn1</b> | T-4    | Tetrahedron                   | $T_d$    | 3.042      |
| <b>1-Zn1</b> | SS-4   | Seesaw                        | $C_{2v}$ | 7.12       |
| <b>2-Cd1</b> | HP-6   | Hexagon                       | $D_{6h}$ | 32.519     |
| <b>2-Cd1</b> | PPY-6  | Pentagonal pyramid            | $C_{5v}$ | 24.086     |
| <b>2-Cd1</b> | OC-6   | Octahedron                    | $O_h$    | 1.934      |
| <b>2-Cd1</b> | TPR-6  | Trigonal prism                | $D_{3h}$ | 12.544     |
| <b>2-Cd1</b> | JPPY-6 | Johnson pentagonal pyramid J2 | $C_{5v}$ | 28.399     |
| <b>3-Pb1</b> | HP-6   | Hexagon                       | $D_{6h}$ | 33.225     |
| <b>3-Pb1</b> | PPY-6  | Pentagonal pyramid            | $C_{5v}$ | 24.836     |
| <b>3-Pb1</b> | OC-6   | Octahedron                    | $O_h$    | 4.495      |
| <b>3-Pb1</b> | TPR-6  | Trigonal prism                | $D_{3h}$ | 12.252     |
| <b>3-Pb1</b> | JPPY-6 | Johnson pentagonal pyramid J2 | $C_{5v}$ | 26.486     |
| <b>4-Zn1</b> | HP-6   | Hexagon                       | $D_{6h}$ | 33.392     |
| <b>4-Zn1</b> | PPY-6  | Pentagonal pyramid            | $C_{5v}$ | 22.443     |
| <b>4-Zn1</b> | OC-6   | Octahedron                    | $O_h$    | 2.490      |
| <b>4-Zn1</b> | TPR-6  | Trigonal prism                | $D_{3h}$ | 11.594     |
| <b>4-Zn1</b> | JPPY-6 | Johnson pentagonal pyramid J2 | $C_{5v}$ | 26.479     |
| <b>5-Cd1</b> | HP-6   | Hexagon                       | $D_{6h}$ | 33.301     |
| <b>5-Cd1</b> | PPY-6  | Pentagonal pyramid            | $C_{5v}$ | 19.448     |
| <b>5-Cd1</b> | OC-6   | Octahedron                    | $O_h$    | 2.765      |
| <b>5-Cd1</b> | TPR-6  | Trigonal prism                | $D_{3h}$ | 10.601     |
| <b>5-Cd1</b> | JPPY-6 | Johnson pentagonal pyramid J2 | $C_{5v}$ | 23.716     |
| <b>5-Cd2</b> | HP-6   | Hexagon                       | $D_{6h}$ | 50.022     |
| <b>5-Cd2</b> | PPY-6  | Pentagonal pyramid            | $C_{5v}$ | 36.842     |

|              |        |                               |          |        |
|--------------|--------|-------------------------------|----------|--------|
| <b>5-Cd2</b> | OC-6   | Octahedron                    | $O_h$    | 32.270 |
| <b>5-Cd2</b> | TPR-6  | Trigonal prism                | $D_{3h}$ | 39.447 |
| <b>5-Cd2</b> | JPPY-6 | Johnson pentagonal pyramid J2 | $C_{5v}$ | 40.134 |
| <b>5-Cd3</b> | HP-6   | Hexagon                       | $D_{6h}$ | 33.337 |
| <b>5-Cd3</b> | PPY-6  | Pentagonal pyramid            | $C_{5v}$ | 23.843 |
| <b>5-Cd3</b> | OC-6   | Octahedron                    | $O_h$    | 2.165  |
| <b>5-Cd3</b> | TPR-6  | Trigonal prism                | $D_{3h}$ | 11.521 |
| <b>5-Cd3</b> | JPPY-6 | Johnson pentagonal pyramid J2 | $C_{5v}$ | 27.336 |
| <b>5-Cd4</b> | HP-6   | Hexagon                       | $D_{6h}$ | 53.119 |
| <b>5-Cd4</b> | PPY-6  | Pentagonal pyramid            | $C_{5v}$ | 35.658 |
| <b>5-Cd4</b> | OC-6   | Octahedron                    | $O_h$    | 35.288 |
| <b>5-Cd4</b> | TPR-6  | Trigonal prism                | $D_{3h}$ | 38.243 |
| <b>5-Cd4</b> | JPPY-6 | Johnson pentagonal pyramid J2 | $C_{5v}$ | 40.704 |
| <b>6-Pb1</b> | HP-6   | Hexagon                       | $D_{6h}$ | 31.046 |
| <b>6-Pb1</b> | PPY-6  | Pentagonal pyramid            | $C_{5v}$ | 24.746 |
| <b>6-Pb1</b> | OC-6   | Octahedron                    | $O_h$    | 3.020  |
| <b>6-Pb1</b> | TPR-6  | Trigonal prism                | $D_{3h}$ | 14.619 |
| <b>6-Pb1</b> | JPPY-6 | Johnson pentagonal pyramid J2 | $C_{5v}$ | 26.704 |

**Table S2** Details of selected hydrogen bond in **1**

| D–H...A           | $d(D-H)$ (Å) | $d(H...A)$ (Å) | $d(D...A)$ (Å) | $\angle(DHA)$ (deg) |
|-------------------|--------------|----------------|----------------|---------------------|
| C(3)-H(3)...Cl(2) | 0.93         | 2.81           | 3.6743(8)      | 156                 |
| C(6)-H(6)...Cl(2) | 0.93         | 2.80           | 3.5175(7)      | 135                 |

**Table S3** Details of selected hydrogen bond in **2**

| D–H...A           | $d(D-H)$ (Å) | $d(H...A)$ (Å) | $d(D...A)$ (Å) | $\angle(DHA)$ (deg) |
|-------------------|--------------|----------------|----------------|---------------------|
| C(2)-H(2)...Cl(1) | 0.93         | 2.75           | 3.651(13)      | 164                 |
| C(6)-H(6)...Cl(1) | 0.93         | 2.78           | 3.671(9)       | 162                 |

**Table S4** Details of selected hydrogen bond in **3**

| D–H...A           | $d(D-H)$ (Å) | $d(H...A)$ (Å) | $d(D...A)$ (Å) | $\angle(DHA)$ (deg) |
|-------------------|--------------|----------------|----------------|---------------------|
| C(2)-H(2)...Cl(1) | 0.931        | 2.773          | 3.686          | 166.88              |
| C(5)-H(4)...Cl(1) | 0.929        | 2.834          | 3.744          | 166.63              |

**Table S5** Details of selected hydrogen bond in **4**

| D–H...A             | <i>d</i> (D–H) (Å) | <i>d</i> (H...A) (Å) | <i>d</i> (D...A) (Å) | ∠(DHA) (deg) |
|---------------------|--------------------|----------------------|----------------------|--------------|
| C(8)-H(8)...Cl(4)   | 0.93               | 2.57                 | 3.4010(1)            | 149          |
| C(14)-H(14)...Cl(4) | 0.93               | 2.81                 | 3.4753(1)            | 129          |

**Table S6** Details of selected hydrogen bond in **5**

| D–H...A          | <i>d</i> (D–H) (Å) | <i>d</i> (H...A) (Å) | <i>d</i> (D...A) (Å) | ∠(DHA) (deg) |
|------------------|--------------------|----------------------|----------------------|--------------|
| C00K-H00K...Cl07 | 0.93               | 2.67                 | 3.3559(1)            | 132          |
| C00O-H00O...Cl0C | 0.93               | 2.80                 | 3.5104(1)            | 134          |
| C013-H013...Cl09 | 0.93               | 2.83                 | 3.4007(1)            | 121          |
| C016-H016...Cl0A | 0.93               | 2.62                 | 3.4770(1)            | 153          |
| C01Y-H01Y...Cl06 | 0.93               | 2.72                 | 3.5084(1)            | 143          |
| C021-H021...Cl08 | 0.93               | 2.62                 | 3.5235(1)            | 164          |
| C022-H022...Cl09 | 0.93               | 2.73                 | 3.3490(1)            | 125          |

**Table S7** Details of selected hydrogen bond in **6**

| D–H...A              | <i>d</i> (D–H) (Å) | <i>d</i> (H...A) (Å) | <i>d</i> (D...A) (Å) | ∠(DHA) (deg) |
|----------------------|--------------------|----------------------|----------------------|--------------|
| C(2)-H(2)...Cl(2A)   | 0.93               | 2.79                 | 3.44(3)              | 128          |
| C(2)-H(2)...Cl(2B)   | 0.93               | 2.77                 | 3.61(3)              | 150          |
| C(2A)-H(2A)...Cl(2A) | 0.93               | 2.59                 | 3.48(3)              | 161          |

**Table S8** Selected bond lengths (Å) and angles (°) for **1**

|                   |            |                  |           |
|-------------------|------------|------------------|-----------|
| Zn(1)-Cl(1)       | 2.2053(11) | Zn(1)-N(1)       | 2.055(3)  |
| Zn(1)-Cl(2)       | 2.2083(11) | Zn(1)-N(2)       | 2.072(3)  |
| Cl(1)-Zn(1)-Cl(2) | 114.77(4)  | N(1)-Zn(1)-N(2)  | 81.09(11) |
| N(1)-Zn(1)-Cl(1)  | 108.69(8)  | N(2)-Zn(1)-Cl(1) | 124.68(9) |
| N(1)-Zn(1)-Cl(2)  | 115.87(9)  | N(2)-Zn(1)-Cl(2) | 107.61(5) |

**Table S9** Selected bond lengths (Å) and angles (°) for **2**

|               |          |               |          |
|---------------|----------|---------------|----------|
| Cd(1)-Cl(1)   | 2.552(2) | Cd(1)-Cl(1)#3 | 2.753(2) |
| Cd(1)-Cl(1)#1 | 2.552(2) | Cd(1)-N(1)    | 2.353(6) |
| Cd(1)-Cl(1)#2 | 2.753(2) | Cd(1)-N(1)#1  | 2.353(6) |

|                       |            |                      |          |
|-----------------------|------------|----------------------|----------|
| Cl(1)#2-Cd(1)-Cl(1)#1 | 84.90(10)  | N(1)#1-Cd(1)-Cl(1)#2 | 85.8(2)  |
| Cl(1)#2-Cd(1)-Cl(1)#3 | 177.40(10) | N(1)#1-Cd(1)-Cl(1)#3 | 92.1(2)  |
| Cl(1)#3-Cd(1)-Cl(1)#1 | 96.70(10)  | N(1)-Cd(1)-Cl(1)     | 161.1(2) |
| Cl(1)-Cd(1)-Cl(1)#1   | 104.40(10) | N(1)-Cd(1)-Cl(1)#1   | 93.0(2)  |
| Cl(1)-Cd(1)-Cl(1)#2   | 96.70(10)  | N(1)-Cd(1)-Cl(1)#2   | 92.1(2)  |
| Cl(1)-Cd(1)-Cl(1)#3   | 84.90(10)  | N(1)-Cd(1)-Cl(1)#3   | 85.8(2)  |
| N(1)#1-Cd(1)-Cl(1)    | 93.0(2)    | N(1)-Cd(1)-N(1)#1    | 70.9(3)  |
| N(1)#1-Cd(1)-Cl(1)#1  | 161.1(2)   |                      |          |

**Table S10 Selected bond lengths (Å) and angles (°) for 3**

|                       |            |                      |           |
|-----------------------|------------|----------------------|-----------|
| Pb(1)-Cl(1)           | 2.844(4)   | Pb(1)-Cl(1)#3        | 3.017(3)  |
| Pb(1)-Cl(1)#1         | 2.844(4)   | Pb(1)-N(1)           | 2.505(10) |
| Pb(1)-Cl(1)#2         | 3.017(3)   | Pb(1)-N(1)#1         | 2.505(10) |
| Cl(1)#1-Pb(1)-Cl(1)   | 167.19(16) | N(1)#1-Pb(1)-Cl(1)#2 | 84.8(2)   |
| Cl(1)#1-Pb(1)-Cl(1)#2 | 87.41(10)  | N(1)#1-Pb(1)-Cl(1)#3 | 150.2(2)  |
| Cl(1)#1-Pb(1)-Cl(1)#3 | 98.58(11)  | N(1)#1-Pb(1)-N(1)    | 66.7(5)   |
| Cl(1)#2-Pb(1)-Cl(1)#3 | 124.49(15) | N(1)-Pb(1)-Cl(1)     | 86.8(2)   |
| Cl(1)-Pb(1)-Cl(1)#2   | 98.57(11)  | N(1)-Pb(1)-Cl(1)#1   | 82.5(2)   |
| Cl(1)-Pb(1)-Cl(1)#3   | 87.41(10)  | N(1)-Pb(1)-Cl(1)#2   | 150.2(2)  |
| N(1)#1-Pb(1)-Cl(1)    | 82.5(2)    | N(1)-Pb(1)-Cl(1)#3   | 84.8(2)   |
| N(1)#1-Pb(1)-Cl(1)#1  | 86.8(2)    |                      |           |

Symmetry codes: #1: -x+2, y, -z+1/2; #2: x, -y+1, z+1/2; #3: -x+2, -y+1, -z.

**Table S11 Selected bond lengths (Å) and angles (°) for 4**

|                   |            |                  |           |
|-------------------|------------|------------------|-----------|
| Zn(1)-Cl(3)       | 2.357(2)   | Zn(1)-N(2A)      | 1.998(15) |
| Zn(1)-N(1)        | 2.222(4)   | Zn(1)-N(4)       | 2.148(6)  |
| Zn(1)-N(1A)       | 2.046(16)  | Zn(1)-N(5)       | 2.215(5)  |
| Zn(1)-N(2)        | 2.168(4)   | Zn(1)-O(1)       | 2.092(6)  |
| N(1)-Zn(1)-Cl(3)  | 165.92(15) | N(2A)-Zn(1)-O(1) | 76.6(6)   |
| N(1A)-Zn(1)-Cl(3) | 111.1(4)   | N(4)-Zn(1)-Cl(3) | 92.83(19) |
| N(1A)-Zn(1)-N(4)  | 154.7(5)   | N(4)-Zn(1)-N(1)  | 101.1(2)  |
| N(1A)-Zn(1)-N(5)  | 93.2(7)    | N(4)-Zn(1)-N(2)  | 165.8(2)  |
| N(1A)-Zn(1)-O(1)  | 95.7(7)    | N(4)-Zn(1)-N(5)  | 76.2(2)   |
| N(2)-Zn(1)-Cl(3)  | 91.87(16)  | N(5)-Zn(1)-Cl(3) | 94.61(14) |
| N(2)-Zn(1)-N(1)   | 75.0(2)    | N(5)-Zn(1)-N(1)  | 90.6(2)   |
| N(2)-Zn(1)-N(5)   | 90.1(2)    | O(1)-Zn(1)-Cl(3) | 90.01(18) |
| N(2A)-Zn(1)-Cl(3) | 161.3(5)   | O(1)-Zn(1)-N(1)  | 87.5(2)   |
| N(2A)-Zn(1)-N(1A) | 83.5(6)    | O(1)-Zn(1)-N(2)  | 101.1(2)  |
| N(2A)-Zn(1)-N(4)  | 75.1(5)    | O(1)-Zn(1)-N(4)  | 92.3(2)   |
| N(2A)-Zn(1)-N(5)  | 96.2(6)    | O(1)-Zn(1)-N(5)  | 167.8(2)  |



**Table S12. Selected bond lengths (Å) and angles (°) for 5**

|                        |            |                        |           |
|------------------------|------------|------------------------|-----------|
| Cd(01)-Cl(05)          | 2.759(6)   | Cd(03)-Cl(08)          | 2.665(6)  |
| Cd(01)-Cl(06)          | 2.529(7)   | Cd(03)-Cl(09)          | 2.545(6)  |
| Cd(01)-Cl(07)#1        | 2.717(6)   | Cd(03)-Cl(0C)#1        | 2.802(7)  |
| Cd(01)-Cl(0A)          | 2.520(5)   | Cd(03)-Cl(0D)          | 2.569(5)  |
| Cd(01)-N(00L)          | 2.363(18)  | Cd(03)-N(00S)          | 2.37(2)   |
| Cd(01)-N(01E)          | 2.41(2)    | Cd(03)-N(00T)          | 2.384(18) |
| Cd(02)-Cl(05)          | 2.572(5)   | Cd(04)-Cl(08)          | 2.518(5)  |
| Cd(02)-Cl(06)#2        | 2.783(7)   | Cd(04)-Cl(09)#2        | 2.702(7)  |
| Cd(02)-Cl(07)          | 2.524(6)   | Cd(04)-Cl(0C)          | 2.563(7)  |
| Cd(02)-Cl(0A)          | 2.646(6)   | Cd(04)-Cl(0D)          | 2.790(6)  |
| Cd(02)-N(00J)          | 2.33(2)    | Cd(04)-N(00H)          | 2.340(19) |
| Cd(02)-N(00U)          | 2.372(18)  | Cd(04)-N(00R)          | 2.393(18) |
| Cl(05)-Cd(02)-Cl(06)#2 | 98.8(2)    | N(00J)-Cd(02)-Cl(06)#2 | 84.8(5)   |
| Cl(05)-Cd(02)-Cl(0A)   | 84.11(18)  | N(00J)-Cd(02)-Cl(07)   | 156.2(5)  |
| Cl(06)-Cd(01)-Cl(05)   | 100.2(2)   | N(00J)-Cd(02)-Cl(0A)   | 94.7(5)   |
| Cl(06)-Cd(01)-Cl(07)#1 | 84.9(2)    | N(00J)-Cd(02)-N(00U)   | 70.4(7)   |
| Cl(07)#1-Cd(01)-Cl(05) | 172.82(17) | N(00L)-Cd(01)-Cl(05)   | 85.7(6)   |
| Cl(07)-Cd(02)-Cl(05)   | 108.2(2)   | N(00L)-Cd(01)-Cl(06)   | 90.5(6)   |
| Cl(07)-Cd(02)-Cl(06)#2 | 83.6(2)    | N(00L)-Cd(01)-Cl(07)#1 | 99.5(6)   |
| Cl(07)-Cd(02)-Cl(0A)   | 95.8(2)    | N(00L)-Cd(01)-Cl(0A)   | 162.9(6)  |
| Cl(08)-Cd(03)-Cl(0C)#1 | 177.84(18) | N(00L)-Cd(01)-N(01E)   | 69.7(7)   |
| Cl(08)-Cd(04)-Cl(09)#2 | 90.15(19)  | N(00R)-Cd(04)-Cl(08)   | 161.0(6)  |
| Cl(08)-Cd(04)-Cl(0C)   | 105.0(3)   | N(00R)-Cd(04)-Cl(09)#2 | 99.1(5)   |
| Cl(08)-Cd(04)-Cl(0D)   | 83.03(17)  | N(00R)-Cd(04)-Cl(0C)   | 92.3(6)   |
| Cl(09)#2-Cd(04)-Cl(0D) | 172.44(18) | N(00R)-Cd(04)-Cl(0D)   | 86.5(5)   |
| Cl(09)-Cd(03)-Cl(08)   | 95.2(2)    | N(00S)-Cd(03)-Cl(08)   | 94.6(5)   |
| Cl(09)-Cd(03)-Cl(0C)#1 | 83.7(2)    | N(00S)-Cd(03)-Cl(09)   | 156.9(5)  |
| Cl(09)-Cd(03)-Cl(0D)   | 108.3(2)   | N(00S)-Cd(03)-Cl(0C)#1 | 85.6(5)   |
| Cl(0A)-Cd(01)-Cl(05)   | 82.82(18)  | N(00S)-Cd(03)-Cl(0D)   | 93.5(5)   |
| Cl(0A)-Cd(01)-Cl(06)   | 103.9(2)   | N(00S)-Cd(03)-N(00T)   | 70.8(6)   |
| Cl(0A)-Cd(01)-Cl(07)#1 | 91.06(19)  | N(00T)-Cd(03)-Cl(08)   | 87.4(5)   |
| Cl(0A)-Cd(02)-Cl(06)#2 | 177.08(19) | N(00T)-Cd(03)-Cl(09)   | 88.8(5)   |
| Cl(0C)-Cd(04)-Cl(09)#2 | 85.5(2)    | N(00T)-Cd(03)-Cl(0C)#1 | 90.7(5)   |
| Cl(0C)-Cd(04)-Cl(0D)   | 99.4(2)    | N(00T)-Cd(03)-Cl(0D)   | 161.7(5)  |
| Cl(0D)-Cd(03)-Cl(08)   | 84.63(18)  | N(00U)-Cd(02)-Cl(05)   | 161.5(6)  |
| Cl(0D)-Cd(03)-Cl(0C)#1 | 97.5(2)    | N(00U)-Cd(02)-Cl(06)#2 | 90.1(6)   |
| N(00H)-Cd(04)-Cl(08)   | 96.2(4)    | N(00U)-Cd(02)-Cl(07)   | 88.9(6)   |
| N(00H)-Cd(04)-Cl(09)#2 | 81.0(5)    | N(00U)-Cd(02)-Cl(0A)   | 87.1(5)   |
| N(00H)-Cd(04)-Cl(0C)   | 154.9(5)   | N(01E)-Cd(01)-Cl(05)   | 96.4(4)   |
| N(00H)-Cd(04)-Cl(0D)   | 96.4(5)    | N(01E)-Cd(01)-Cl(06)   | 153.1(5)  |

|                      |         |                        |         |
|----------------------|---------|------------------------|---------|
| N(00H)-Cd(04)-N(00R) | 69.3(6) | N(01E)-Cd(01)-Cl(07)#1 | 80.8(4) |
| N(00J)-Cd(02)-Cl(05) | 94.1(4) | N(01E)-Cd(01)-Cl(0A)   | 99.0(5) |

Symmetry codes: #1: x, y, z+1; #2: x, y, z-1.

**Table S13. Selected bond lengths (Å) and angles (°) for 6**

|                        |            |                       |           |
|------------------------|------------|-----------------------|-----------|
| Pb(1)-Cl(2A)           | 2.683(7)   | Pb(1)-Cl(2B)#2        | 2.926(5)  |
| Pb(1)-Cl(2A)#3         | 2.683(7)   | Pb(1)-Cl(2B)#3        | 3.023(7)  |
| Pb(1)-Cl(2B)           | 3.023(7)   | Pb(1)-N(1)            | 2.550(14) |
| Pb(1)-Cl(2B)#1         | 2.926(5)   | Pb(1)-N(1A)           | 2.566(14) |
| Cl(2A)#3-Pb(1)-Cl(2B)# | 89.13(16)  | Cl(2B)#3-Pb(1)-Cl(2B) | 156.7(3)  |
| Cl(2A)#3-Pb(1)-Cl(2B)# | 84.68(19)  | N(1)-Pb(1)-Cl(2A)     | 92.1(11)  |
| Cl(2A)-Pb(1)-Cl(2A)#3  | 169.4(3)   | N(1)-Pb(1)-Cl(2A)#3   | 96.8(11)  |
| Cl(2A)-Pb(1)-Cl(2B)#1  | 84.68(19)  | N(1)-Pb(1)-Cl(2B)#1   | 92.9(8)   |
| Cl(2A)-Pb(1)-Cl(2B)#2  | 89.13(16)  | N(1)-Pb(1)-Cl(2B)#2   | 158.7(8)  |
| Cl(2A)-Pb(1)-Cl(2B)#3  | 166.71(15) | N(1)-Pb(1)-Cl(2B)#3   | 76.2(11)  |
| Cl(2B)#1-Pb(1)-Cl(2B)  | 104.07(19) | N(1A)-Pb(1)-Cl(2A)#3  | 104.2(11) |
| Cl(2B)#2-Pb(1)-Cl(2B)  | 89.61(16)  | N(1A)-Pb(1)-Cl(2B)    | 76.5(10)  |

Symmetry codes: #1: x, -y+1, z+1/2; #2: -x+2, -y+1, -z; #3: -x+2, y, -z+1/2.
